# Supplementary figures and images for: Reconstructing the in vivo dynamics of hematopoietic stem cells from telomere length distributions
Source: eLife journal article supplement (doi:10.7554/elife.08687), 2015-10-15

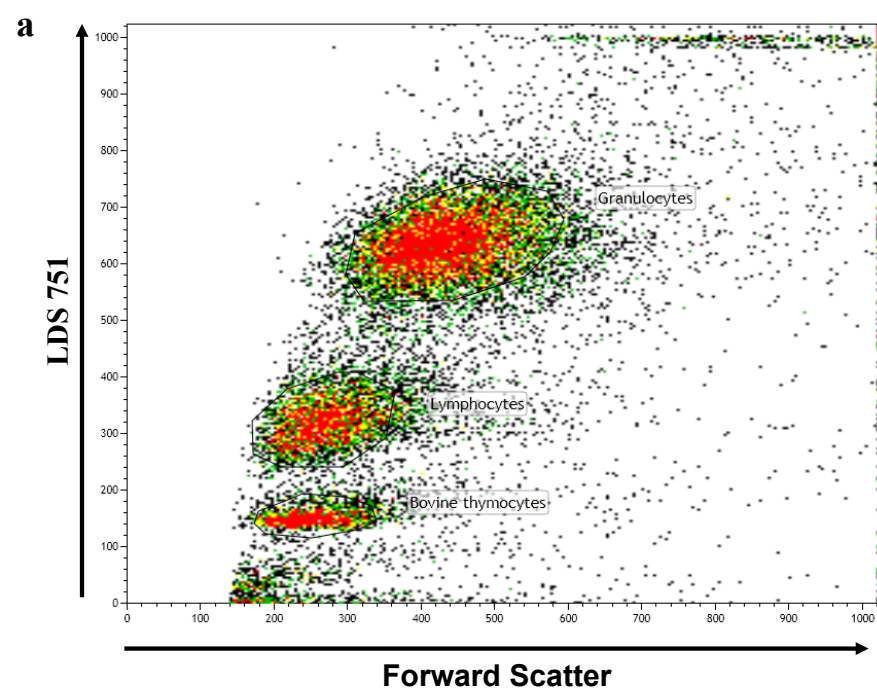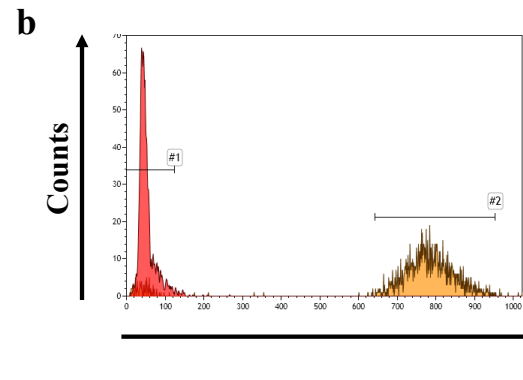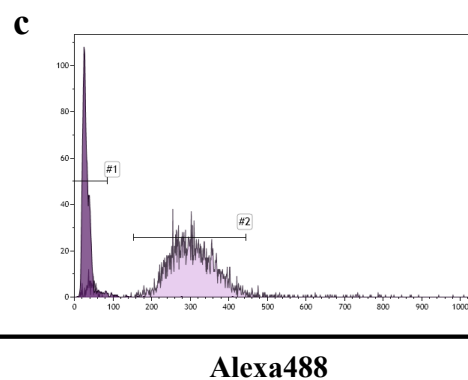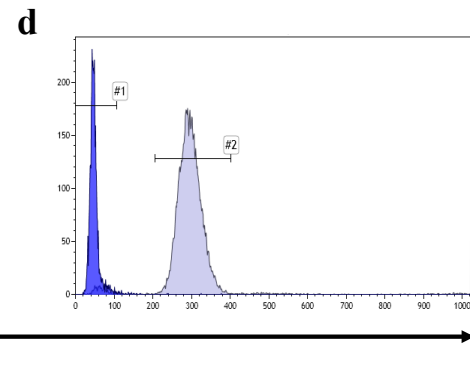

Supplement: supp [file elife-08687-supp-v1.zip]

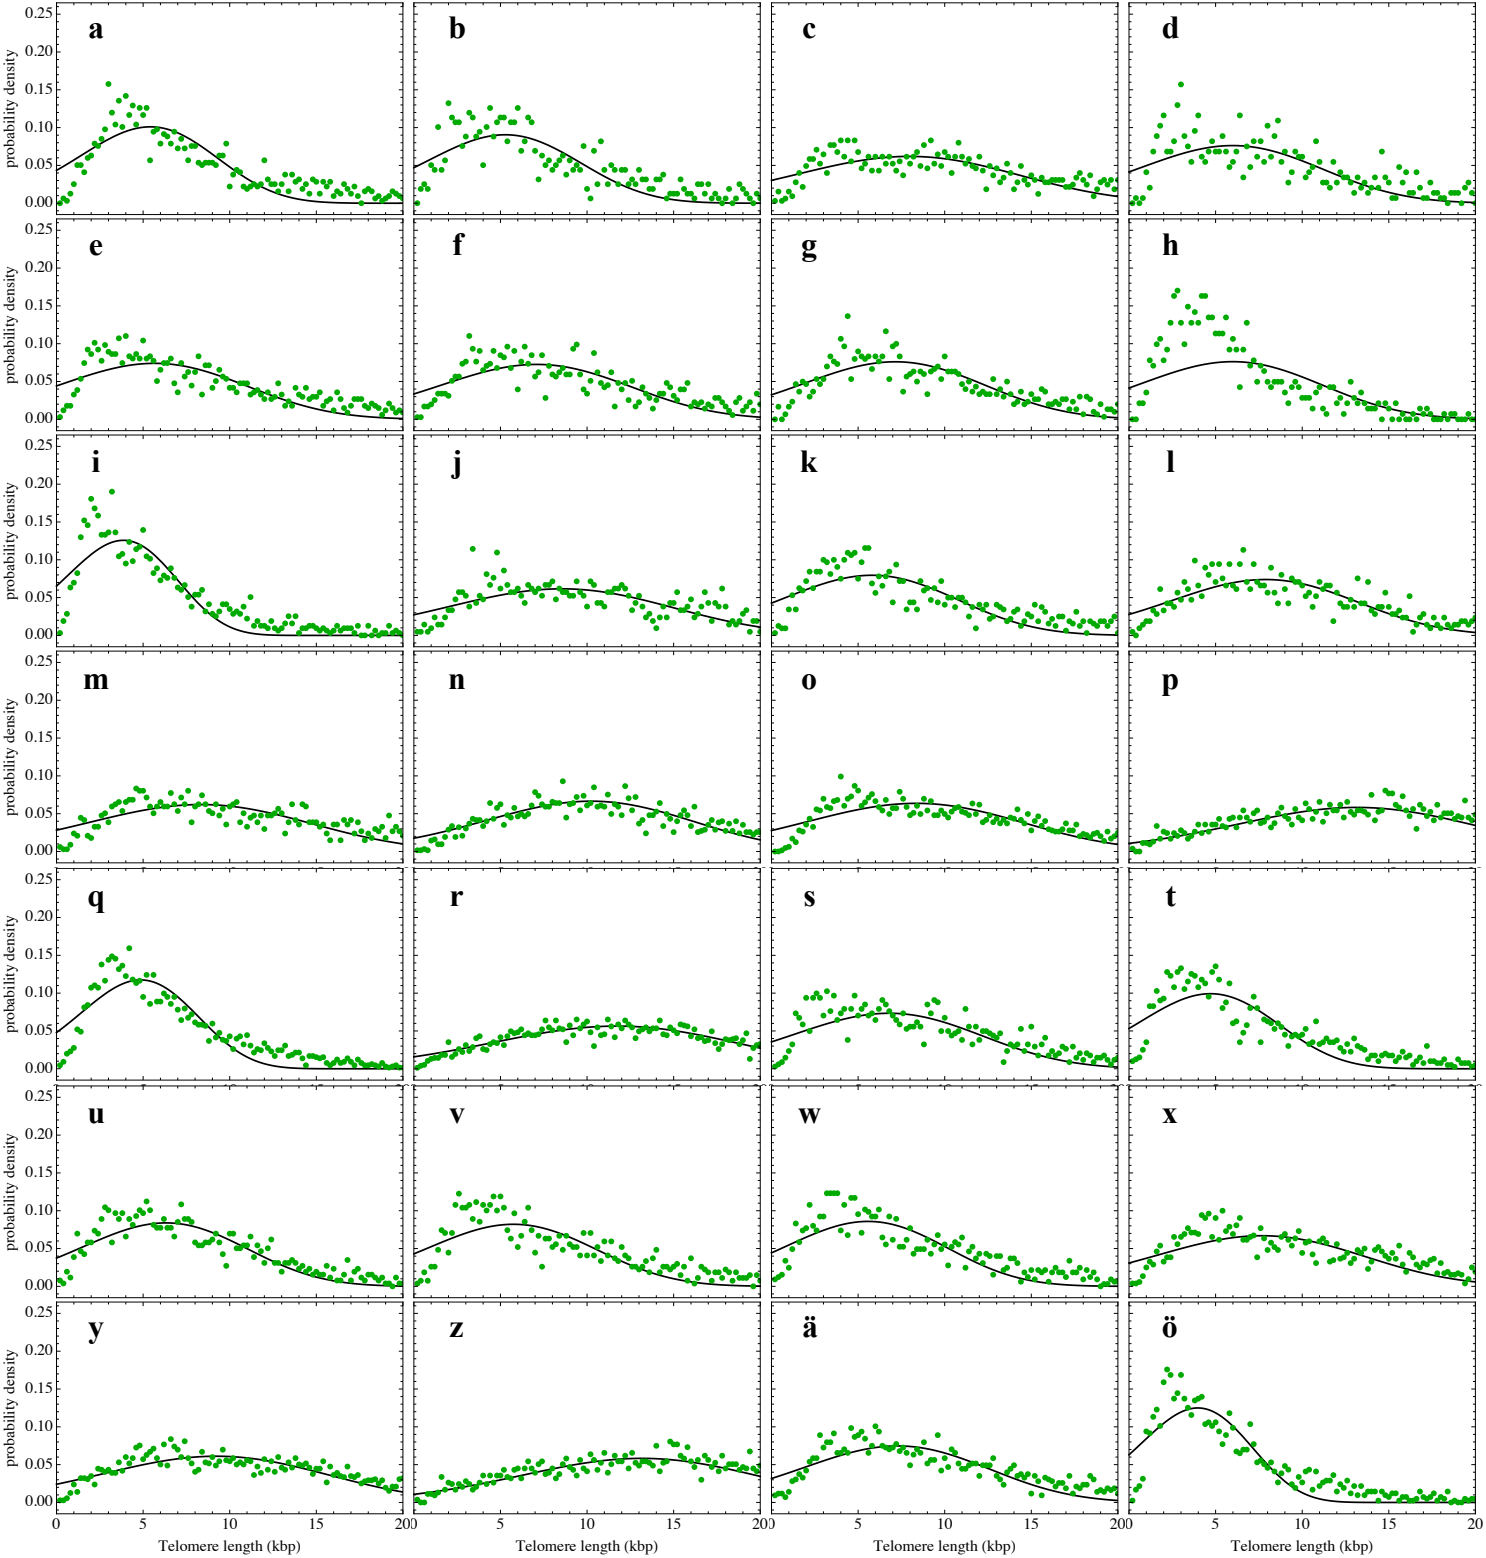

Supplement: supp [file elife-08687-supp-v1.zip]

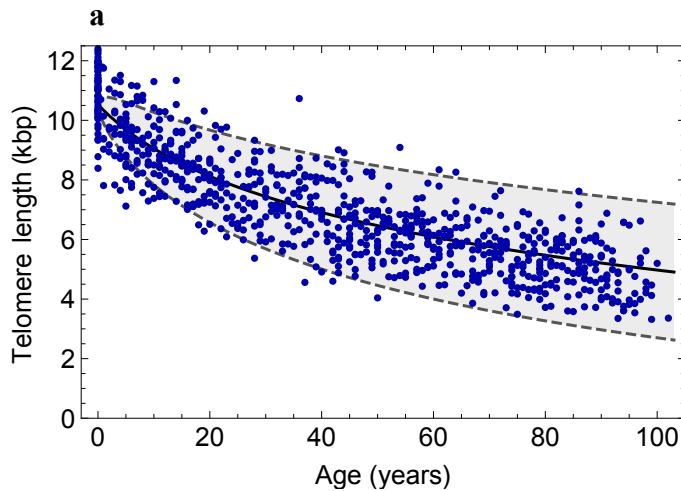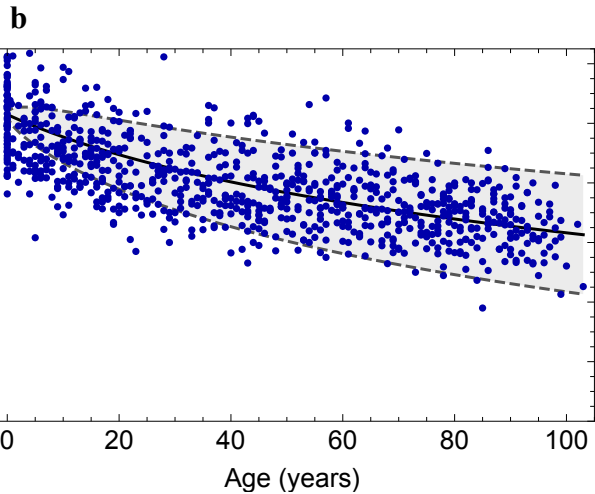

Supplement: supp [file elife-08687-supp-v1.zip]

**a**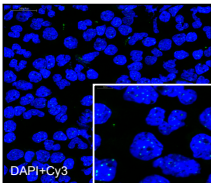**b**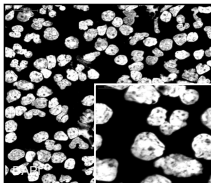**c**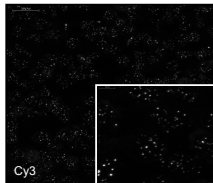**d**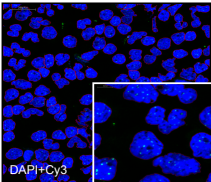**e**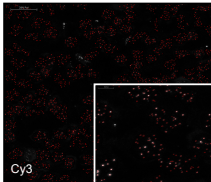

Supplement: supp [file elife-08687-supp-v1.zip]

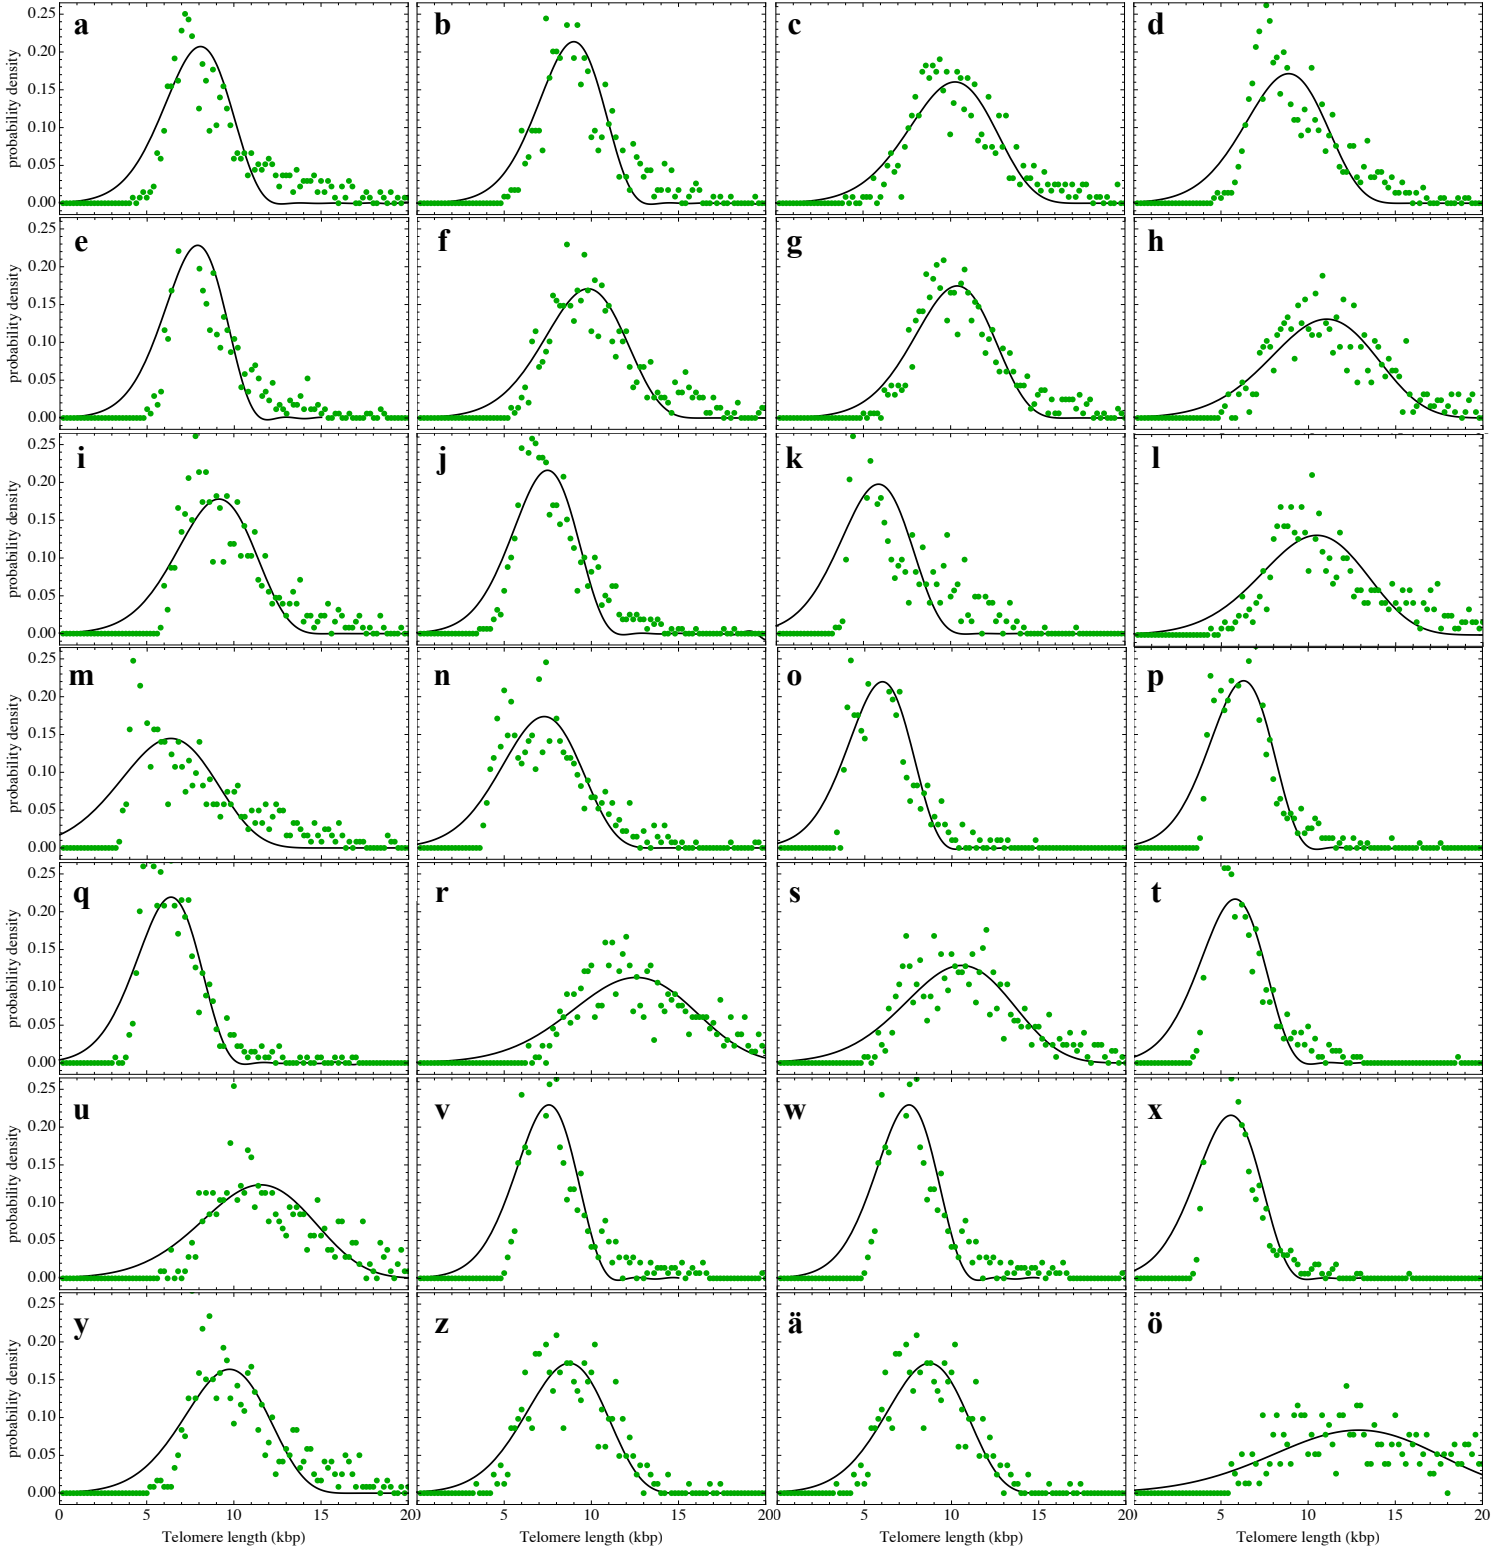

Supplement: supp [file elife-08687-supp-v1.zip]

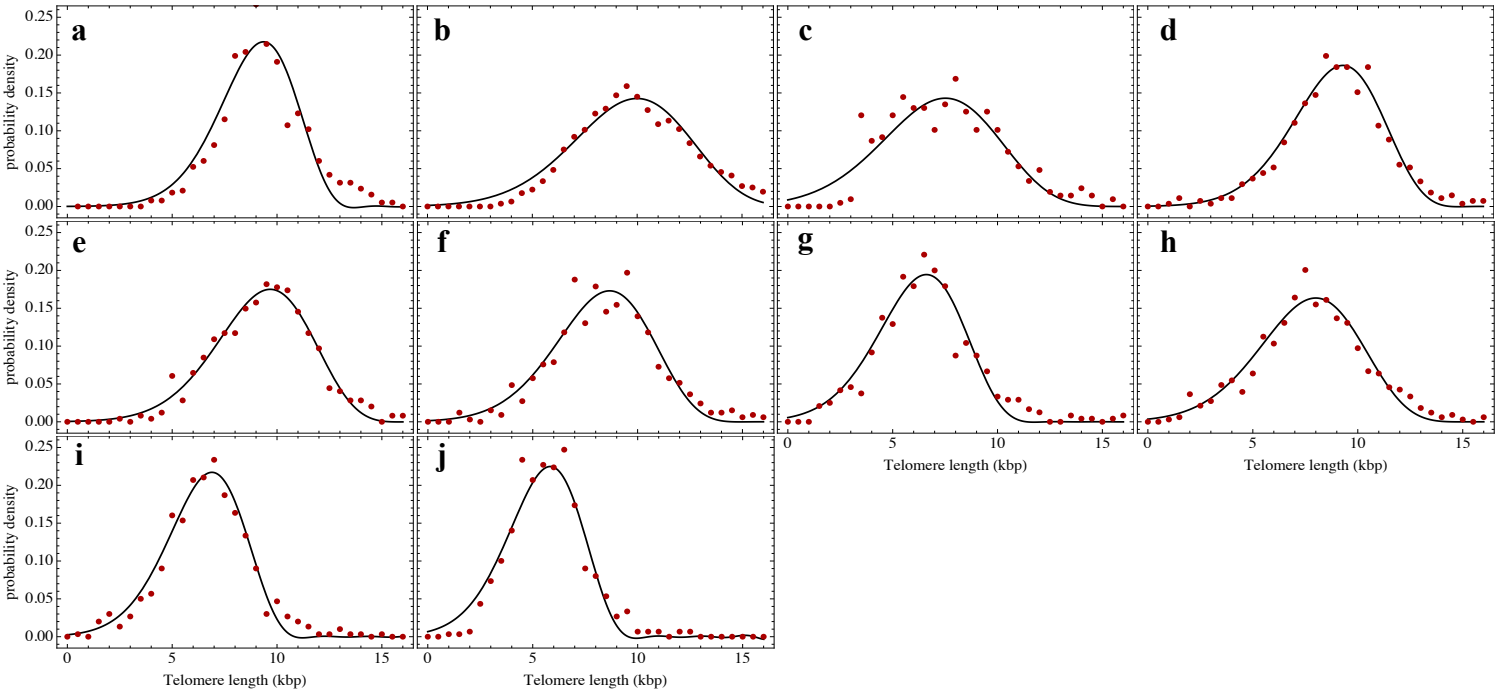

Supplement: supp [file elife-08687-supp-v1.zip]
